# 1 Genetic determinants of wheat resistance to common root rot (spot 2 blotch) and *Fusarium* crown rot

3  
4 Jun Su<sup>1,\*</sup>, Jiaojie Zhao<sup>1,\*</sup>, Shuqing Zhao<sup>1,\*</sup>, Xiaofeng Shang<sup>1</sup>, Shuyong Pang<sup>1,3</sup>, Shisheng Chen<sup>3</sup>, Daqun  
5 Liu<sup>1</sup>, Zhensheng Kang<sup>2,#</sup>, Xiaodong Wang<sup>1,#</sup>  
6

7 <sup>1</sup> State Key Laboratory of North China Crop Improvement and Regulation, College of Plant Protection, Technological Innovation  
8 Center for Biological Control of Crop Diseases and Insect Pests of Hebei Province, Hebei Agricultural University, Baoding,  
9 Hebei 071000, P. R. China;

10 <sup>2</sup> State Key Laboratory of Crop Stress Biology for Arid Areas, College of Plant Protection, Northwest Agriculture and Forestry  
11 University, Yangling, Shaanxi 712100, P. R. China;

12 <sup>3</sup> Institute of Advanced Agricultural Sciences, Peking University, Weifang, Shandong 261000, P. R. China.

13 \* These authors contributed equally to this work.

14 # Correspondence: Dr. Xiaodong Wang (zhibwx@hebau.edu.cn) and Dr. Zhensheng Kang (kangzs@nwsuaf.edu.cn)

15

## 16 Abstract

17 Due to the field soil changes, high density planting, and straw-returning methods, wheat  
18 common root rot (spot blotch) and *Fusarium* crown rot (FCR) have become severe threats  
19 to global wheat productions. Only a few wheat genotypes show moderate resistance to these  
20 root and crown rot fungal diseases, and the genetic determinants of wheat resistance to these  
21 two devastating diseases have been poorly understood. This review summarizes the recent  
22 progress of genetic studies on wheat resistance to common root rot and *Fusarium* crown rot.  
23 Wheat germplasm with relative higher resistance are highlighted and genetic loci controlling  
24 the resistance to each of the disease are summarized.

25

26 **Keywords:** wheat, resistance, QTLs, common root rot, spot blotch, *Fusarium* crown rot

27

## 28 1. Introduction

29 Various long-term environmental changes have greatly shaped the epidemics of different crop  
30 diseases. For instance, the higher temperatures associated with the trends of global warming  
31 may increase the severity of many plant diseases (Cohen and Leach, 2020). The bursts of  
32 wheat stem base rot diseases, including common root rot and *Fusarium* crown rot, are highly  
33 correlated with the crop rotations. The large-scale application of wheat-maize rotation in the

1 North China wheat cultivation area has dramatically changed the organic carbon, fertilization  
2 state, and nitrogen balance of the soil (Zhao et al., 2006; Wang et al., 2015). The disease  
3 suppressive capacity of the soil microbiome is also largely dependent on crop rotational  
4 diversity (Peralta et al., 2018).

5 Wheat common root rot is caused by *Bipolaris sorokiniana* infection (**Fig. 1A**, teleomorph  
6 *Cochliobolus sativus*) in the root and stem base of wheat and barley. Severe infections of this  
7 fungal pathogen in the root and crown of seedlings may lead to fatal damage of plants. The  
8 same pathogen can also induce phenotypes of leaf spot (spot blotch, Helminthosporium leaf  
9 blight, or foliar blight, **Fig. 1B**), seedling wilt, head blight, and black point in *Triticeae* crops  
10 (Kumar et al., 2002). The average yield loss caused by *B. sorokiniana* ranges from 15% to  
11 20%, but under favorable heat and drought conditions this disease can decrease wheat  
12 production by 70% and reduce seed quality (Sharma and Duveiller, 2007). This fungal  
13 pathogen accumulates several toxins including prehelminthosporol, helminthosporol,  
14 helminthosporic acid, sorokinianin, and bipolaroxin to kill or weaken plant cells (Kumar et al.,  
15 2002; Gupta et al., 2018). However, the potential negative impact of *B. sorokiniana*-infected  
16 wheat grains (black point) on food safety has not been investigated in detail. The fungus *B.*  
17 *sorokiniana* has a very wide host range, and can infect wheat, barley, maize, rice, and many  
18 other grass species (Gupta et al., 2018). Earlier studies suggested that multiple-year *Triticeae*  
19 crop rotations of wheat and barley greatly promote the severity of common root rot caused by  
20 *B. sorokiniana* (Conner et al., 1996). Maize crops and returned straws may also serve as  
21 infection hosts of this fungus, so common root rot and spot blotch have been more frequently  
22 observed in wheat cultivation areas in North China, where large-scale wheat-maize rotation  
23 and the use of straw returning have been applied.

24 *Fusarium* crown rot (FCR) is caused by infection of *Fusarium pseudograminearum* (**Fig.**  
25 **1C**), or several other *Fusarium* pathogens including *F. culmorum*, *F. avenaceum*, and *F.*  
26 *graminearum*. These fungal species infect the coleoptile, leaf sheath, and stem base of wheat  
27 seedlings, generating browning and decay phenotypes. *Fusarium* pathogens are globally  
28 wide-spread in arid and semi-arid wheat planting areas (Kazan and Gardiner, 2018). The  
29 estimated yield loss of winter wheat due to FCR infections in the Northwest Pacific region of  
30 the United States reached 35% (Smiley et al., 2005). Moreover, when FCR-infected plants are

1 co-infected with *Fusarium* Head Blight (FHB), wheat seeds are likely to be contaminated by  
2 fungal toxins such as deoxynivalenol (DON) and nivalenol (NIV), which greatly threaten the  
3 health of human and livestock (Monds et al., 2005; Obanor and Chakraborty, 2014). Maize  
4 also can serve as host to various *Fusarium* pathogens, and the fungi from infected plants can  
5 remain active in returned straw debris as long as five years (Burgess et al., 2001). For these  
6 reasons, FCR is a growing threat to wheat cultivation in wheat-maize rotation regions in  
7 North China.

8 These two diseases share several similar phenotypes such as stem base rot, head blight, and  
9 seed contamination, but they can be distinguished by their phenotypic features. For common  
10 root rot caused by *B. sorokiniana*, the infected wheat plants can be easily pulled out, the stem  
11 base and root system feel wet, and black and brown striped spots can be observed in both the  
12 stem base and lower leaves (**Fig. 1B**). For FCR caused by *F. pseudograminearum*, the stem  
13 base of the infected wheat plant is dry and fragile, and can be easily broken apart, and dark  
14 and red brown rot can be observed in the stem base (**Fig. 1D**).

15

## 16 **2. Progress in dissecting the genetic determinants of wheat resistance to common root** 17 **rot (spot blotch)**

18 Breeding of wheat resistant cultivars remains the most efficient and economical way to  
19 control common root rot (spot blotch). However, there are insufficient germplasm resources  
20 with resistance to common root rot to meet the needs for global wheat breeding applications  
21 and there have been few studies to identify the genetic loci that control resistance to common  
22 root rot (Gupta et al., 2018). Early effort focused on the introgression of common root rot  
23 resistant loci from wheat relative *Thinopyrum ponticum* species (Li et al., 2004). Requiring  
24 complex quantitative trait loci (QTL), wheat breeding programs for common root rot  
25 resistance have faced many obstacles (Joshi et al., 2004). Using bi-parental populations and  
26 linkage mapping, four genetic loci with major resistant effect were identified and designated  
27 as *Sb* genes. *Sb1* was discovered in the bread wheat line “Saar”, was mapped to chromosome  
28 7DS, and is associated with the wheat leaf rust resistance gene *Lr34* (Lillemo et al., 2013).  
29 The *Lr34/Yr18/Pm38* gene encodes a ATP-binding cassette (ABC) transporter that confers  
30 broad-spectrum resistance to multiple foliar fungal diseases, including leaf rust, stripe rust,

1 and powdery mildew (Krattinger et al., 2009). Another minor QTL that corresponded with  
2 *Lr46* on chromosome 1BL was also identified from “Saar”. The *Lr46* gene is associated with  
3 adult plant slow rusting resistance toward leaf rust and is also associated with stripe rust  
4 resistance gene *Yr29* (William et al., 2003). The *Sb2* gene was identified in bread wheat  
5 cultivar “Yangmai 6” and was mapped to chromosome 5BL between simple sequence repeat  
6 (SSR) markers of *Xgwm639* and *Xgwm1043* (Kumar et al., 2015). The *Sb2* gene was later  
7 reported to be linked with the *Tsn1* gene, which confers host-selective sensitivity to the fungal  
8 toxin ToxA produced by *Pyrenophora tritici-repentis* (Kumar et al., 2016). The *Sb3* gene was  
9 discovered in the winter wheat line “621-7-1” as providing immune response to *B.*  
10 *sorokiniana*. Using bulked segregant analysis (BSA), *Sb3* was mapped to chromosome 3BS,  
11 flanking SSR markers of *Xbarc133* and *Xbarc147* (Lu et al., 2016). The *Sb4* gene was  
12 recently identified from two highly resistant wheat lines “Zhongyu1211” and “GY17”. Using  
13 RNA-based BSA and single-nucleotide polymorphism (SNP) mapping, *Sb4* was delimited  
14 in a 1.19 cM genetic interval region of chromosome 4BL, which contains 21 predicted genes  
15 in the corresponding “Chinese Spring” genome (Zhang et al., 2020). Future efforts to clone  
16 these designated *Sb* genes with major resistant effect may help elucidate the mechanism of  
17 wheat resistance toward this devastating fungal pathogen.

18 Several other major QTLs have been discovered and preliminarily mapped using  
19 bi-parental populations. For instance, in an earlier investigation, two resistant QTLs derived  
20 from “Yangmai 6” were mapped to chromosomes 5B and 7D using microsatellite markers  
21 (Kumar et al., 2005). Three QTLs on chromosomes 5B, 6A, and 6D were designated based on  
22 analysis of SSR markers from resistant genotype “G162” (Sharma et al., 2007). Four QTLs  
23 controlling resistance of wheat cultivar “Yangmai 6” to *B. sorokiniana* were mapped to  
24 chromosomes 2AL, 2BS, 5BL, and 6DL (Kumar et al., 2009). A total of seven QTLs  
25 providing resistance to *B. sorokiniana* infections were designated in wheat lines “Ning 8201”  
26 and “Chirya 3” (Kumar et al., 2010). Three QTLs on chromosomes 1BS, 3BS, and 5AS  
27 explained 8.5%, 17.6%, and 12.3%, respectively of resistant effect in “SYN1”, a CIMMYT  
28 (International Maize and Wheat Improvement Center) synthetic-derived bread wheat line  
29 (Zhu et al., 2014). From a Brazilian resistant cultivar “BH 1146”, two QTLs on chromosomes  
30 7BL and 7DL were mapped using microsatellite markers (Singh et al., 2016). A prominent

1 resistant QTL near the *Vrn-A1* locus on chromosome 5AL was found in “BARTAI” and  
2 “WUYA” CIMMYT breeding lines (Singh et al., 2018). QTLs in *Vrn-A1* and *Sb2/Tsn1* loci  
3 were also detected in two other CIMMYT breeding lines, “CASCABEL” and “KATH” (He et  
4 al., 2020).

5 Genome-wide association study (GWAS) can also be used to map QTLs. Using 832  
6 polymorphic Diversity Arrays Technology (DArT) markers, four QTLs resistant to spot blotch  
7 were mapped to chromosomes 1A, 3B, 7B, and 7D after analysis of 566 spring wheat  
8 germplasms (Adhikari et al., 2012). With recent progress in drafting the physical genome of  
9 hexaploid wheat (Appels et al., 2018), high-throughput SNP toolkits are now available for  
10 GWAS on various complex traits of wheat (Sun et al., 2020). A total of 528 spring wheat  
11 genotypes from different geographic regions were tested for spot blotch resistance and eleven  
12 associated SNP markers were found by 9K SNP assay (Gurung et al., 2014). A phenotypic  
13 screening of 11 parental genotypes and 55 F<sub>2</sub> lines identified “19HRWSN6” as a resistant  
14 source. Subsequent simple linear regression analysis revealed SSR markers on chromosomes  
15 5B, 6A, and 7D associated with the resistance to *B. sorokiniana* (Tembo et al., 2017). Another  
16 study evaluated the responses of 294 hard winter wheat genotypes to *B. sorokiniana* and  
17 performed GWAS by 15K SNP assay. A total of ten wheat genotypes with relatively high  
18 resistance were identified and six major resistant QTLs were designated to collectively  
19 explain 30% of the phenotypic variation (Ayana et al., 2018). A total of 159 spring wheat  
20 genotypes were screened for common root rot resistance and twenty-four QTLs were  
21 identified, with a major one on chromosome 7B that explained 14% of the phenotypic  
22 variation of spot blotch severity (Jamil et al., 2018). Another study profiled the resistant  
23 phenotype of 287 spring wheat germplasms and performed GWAS using 90K SNP array. A  
24 total of eight genetic loci associated with incubation period, lesion number, and disease score  
25 of *B. sorokiniana* infection were detected (Ahirwar et al., 2018). A recent study phenotyped  
26 301 Afghan wheat germplasms and found that approximately 15% exhibited lower disease  
27 scores than the resistant control. Subsequent a GWAS approach identified twenty-five  
28 marker-trait associations on more than twelve chromosomes, including previously identified  
29 *Vrn-A1* and *Sb2/Tsn1* loci (Bainsla et al., 2020). Another 141 spring wheat lines were  
30 collected for GWAS on spot blotch resistance. A total of 23 genomic regions were identified,

1 including several stable regions on chromosomes 2B, 5B and 7D, and a novel region on  
2 chromosome 3D (Tomar et al., 2020).

3 We have summarized the previously reported wheat germplasms with relatively higher  
4 resistance to *B. sorokiniana* (**Table 1**). These wheat materials may serve as valuable resources  
5 for the genetic improvement of wheat resistance to common root rot (spot blotch). We have  
6 also summarized detailed information of previously designated resistant QTLs (**Table 1**) and  
7 drafted their genomic distribution using the released genome of hexaploid wheat (**Fig. 2**).

8

### 9 **3. Genetic loci controlling wheat resistance to *Fusarium* crown rot**

10 Since the causal agent of *Fusarium* head blight (FHB), *Fusarium graminearum*, can also  
11 induce the phenotype of *Fusarium* crown rot in certain regions (Akinsanmi et al., 2006; Zhou  
12 et al., 2019), it is likely that FHB-resistant germplasms and genetic loci can be exploited to  
13 improve FCR resistance. For instance, the recently cloned FHB resistance gene *Fhb7* encodes  
14 a glutathione S-transferase (GST) and provides broad resistance to *Fusarium* diseases,  
15 including FCR induced by *F. pseudograminearum*, by detoxifying trichothecenes through  
16 de-epoxidation (Wang et al., 2020). However, an earlier investigation found no significant  
17 correlation of resistant phenotype or genetic loci conferring resistance to FHB and FCR in the  
18 same wheat genotypes (Li et al., 2010). A recent large-scale phenotyping of 205 Chinese  
19 wheat cultivars for resistance to both FHB and FCR also found no correlation (Shi et al.,  
20 2020). Great efforts have also been towards identification of FCR-resistant barley germplasms  
21 and genetic loci that control the FCR-resistance in barley (Liu and Ogonnaya, 2015). Since  
22 recent review papers have already summarized QTLs conferring FHB resistance and  
23 susceptibility in wheat in detail (Buerstmayr et al., 2020; Fabre et al., 2020), here we have  
24 mainly focused on studies reporting wheat resistance to FCR induced by *F.*  
25 *pseudograminearum* and *F. culmorum*.

26 A series of genetic studies was performed to reveal a major QTL on chromosome 3BL  
27 (*Qcrs.cpi-3B*). This resistant locus, *Qcrs.cpi-3B*, was derived from wheat genotype “CSCR6”  
28 belonging to the taxon *Triticum spelta* (Ma et al., 2010). In a wheat recombinant inbred line  
29 population of “Lang/CSCR6”, a QTL on chromosome 4B derived from “Lang” was  
30 responsible for the soil-free FCR resistance (Yang et al., 2010). Another significant QTL on

1 chromosome 6B, but not *Qcrs.cpi-3B*, was identified and responsible for the FCR resistance  
2 during an introgression process for durum wheat using “CSCR6” as the donor parent (Ma et  
3 al., 2012b). Near-isogenic lines for the *Qcrs.cpi-3B* locus were developed for both genetic  
4 research and breeding (Ma et al., 2012a), and subsequent transcriptome and allele specificity  
5 analysis revealed differentially expressed genes associated with this locus (Ma et al., 2014).  
6 Fine mapping of this QTL shortened the genetic interval to 0.7 cM, containing a total of 63  
7 coding genes in the reference wheat genome (Zheng et al., 2015). Future map-based cloning  
8 and validation of the functional gene in this large-effect QTL may provide valuable clues for  
9 us to understand the molecular bases of wheat resistance to FCR.

10 Other resistant QTLs have been identified using bi-parental populations. Early  
11 investigation discovered a resistant locus near the dwarfing gene *Rht1* on chromosome 4B  
12 from the wheat cultivar “Kukri” (Wallwork et al., 2004). Inherited from a wheat line  
13 “W21MMT70” with partial resistance to FCR, two QTLs were identified and mapped to  
14 chromosomes 2D and 5D (Bovill et al., 2006). A major QTL on chromosome 1DL  
15 (*QCr.usq-1D1*) and several minor QTLs were identified in wheat line “2-49 (Gluyas  
16 Early/Gala)” using SSR markers (Collard et al., 2005; Collard et al., 2006). An initial FCR  
17 resistance screening of 32 wheat genotypes revealed “2-49”, “Aso zairai 11”, and “Ernie” as  
18 resistant sources. A QTL derived from “Ernie” was mapped to chromosome 3BL close to  
19 markers *wPt-1151* and *wPt-1834* (Li et al., 2010). Another study reported that an Australian  
20 spring wheat cultivar “Sunco” showed partial resistance to FCR induced by *F.*  
21 *pseudograminearum*. Using bi-parental QTL mapping, a major QTL was identified on  
22 chromosome 3BL, between SSR markers *Xgwm247* and *Xgwm299* (Poole et al., 2012). These  
23 resistant sources of “W21MMT70”, “2-49”, and “Sunco” were then employed for QTL  
24 pyramiding (Bovill et al., 2010). Four FCR-resistant QTLs were designated and their resistant  
25 alleles were derived from the bread wheat commercial variety “EGA Wylie”. Major QTLs on  
26 chromosomes 5DS and 2DL were consistently detected in all three populations and two minor  
27 QTLs were mapped to chromosome 4BS (Zheng et al., 2014). QTL mapping was also  
28 performed to find genetic loci controlling partial resistance to FCR in the four wheat  
29 germplasms “2-49”, “Sunco”, “IRN497”, and “CPI133817”. FCR resistance was evaluated in  
30 both seedlings and adult plants and a total of six QTLs among these resistant wheat sources

1 were detected (Martin et al., 2015).

2 A GWAS approach was used to screen 2,514 wheat genotypes for FCR resistance and  
3 identified two major QTLs on chromosome 3BL explaining between 35% and 49% of the  
4 phenotypic variation using DArT and SSR markers (Liu et al., 2018). A set of 126 spring  
5 bread wheat lines from CIMMYT were phenotyped against FCR induced by *F. culmorum* and  
6 further genotyped using DArT markers, which resulted in the identification of three major  
7 QTLs on chromosomes 3B and 2D (Erginbasorakci et al., 2018). The use of GWAS for FCR  
8 resistance has greatly benefited from advanced high-throughput sequencing techniques and  
9 the released hexaploid wheat genome. A total of 234 Chinese wheat cultivars were evaluated  
10 for FCR resistance in four greenhouse experiments, with GWAS conducted using a  
11 high-density 660K SNP assay. This revealed a major QTL on chromosome 6A, which was  
12 subsequently validated using a bi-parental population of “UC1110/PI610750” (Yang et al.,  
13 2019). A recent GWAS approach phenotyped 358 Chinese germplasms for FCR resistance  
14 and less than 10% of germplasms showed a lower disease index. The wheat 55K SNP assay  
15 was applied for the association analysis, resulting in detection of significant QTLs on  
16 chromosomes 1BS, 1DS, 5DS, 5DL, and 7BL (Jin et al., 2020). Another GWAS was  
17 performed to evaluate FCR resistance of 161 wheat accessions under growth room and  
18 greenhouse conditions using *F. culmorum* as the pathogen. Using a 90K SNP array, a total of  
19 fifteen QTLs for FCR resistance were detected with one major QTL on chromosome 3BS  
20 near the FHB resistance *Fhb1* locus (Pariyar et al., 2020). A marker-assisted recurrent  
21 selection approach was performed on two populations to pyramid minor FCR-resistant QTLs.  
22 Using 9K SNP array, a total of 23 marker-trait associations were identified by GWAS  
23 (Rahman et al., 2020).

24 In **Table 2**, we have summarized wheat germplasms resistant to FCR induced by either *F.*  
25 *pseudograminearum* or *F. culmorum*. Reported QTLs controlling FCR resistance are also  
26 highlighted (**Table 2**), with their genomic distributions annotated using the wheat genome  
27 database (**Fig. 3**).

28

#### 29 **4. Conclusion and future perspectives**

30 We have briefly introduced two rot diseases that are commonly observed in the stem base of



1 the wheat plant (**Fig. 1**). Both of diseases have become major threats to wheat productions in  
2 wheat-maize rotation areas with large-scale application of straw returning. Wheat breeding is  
3 still the most efficient way to control these two devastating fungal diseases. However, as  
4 summarized in this review (**Tables 1 and 2**), there are few wheat germplasms with relative  
5 high resistance to either *B. sorokiniana* or *F. pseudograminearum*. Large-scale screening of  
6 wheat germplasms that are resistant to these diseases is still urgently needed for effective  
7 wheat breeding applications.

8 Genetic improvement of wheat resistance to these two diseases will also be facilitated by  
9 exploring novel QTLs that control resistance and dissecting functional genes within these  
10 QTLs. In this review, we list previously reported resistant QTLs (**Tables 1 and 2**) and present  
11 their genomic distributions based on the updated wheat genome (**Figs. 2 and 3**). For  
12 identified QTLs conferring resistance to *B. sorokiniana*, may be associations with certain  
13 resistant loci responsible for wheat resistance to other foliar fungal diseases, such as  
14 *Lr34/Yr18/Pm38*, *Lr46/Yr29*, and *Tsn1*. Wheat leaves might restrain the infection of different  
15 foliar fungal diseases by utilization of similar molecular approaches mediated by these  
16 resistant genes. More wheat germplasms with broad-spectrum resistant loci should be  
17 evaluated for their potential resistance to spot blotch or common root rot induced by *B.*  
18 *sorokiniana*. For QTLs controlling resistance to *Fusarium* crown rot, ones that also have  
19 resistance to FHB may be more valuable, since the major causal agents of these diseases (*F.*  
20 *pseudograminearum*, *F. culmorum*, and *F. graminearum*) very likely co-exist in a cultivation  
21 environment. Studies of FCR-resistant wheat germplasms that investigate the genetic  
22 determinants of FCR-resistance can build on the work performed to investigate resistance to  
23 FHB. Progress in wheat genome research and increased availability of high-density SNP  
24 toolkits will facilitate the use of GWAS on collected wheat germplasms to efficiently identify  
25 resistant germplasms and genetic loci.

26

## 27 **Acknowledgement**

28 This work was supported by the National Natural Science Foundation of China (31701776),  
29 the Provincial Natural Science Foundation of Hebei for Excellent Young Scholar  
30 (C2018204091), Provincial Supporting Program of Hebei for the Returned Oversea Scholars

1 (C20190180).

2

### 3 Reference

- 4 Adhikari, T.B., Gurung, S., Hansen, J.M., Jackson, E.W., and Bonman, J.M. 2012. Association mapping of  
5 quantitative trait loci in spring wheat landraces conferring resistance to bacterial leaf streak  
6 and spot blotch. *The Plant Genome* **5**, 1-16.
- 7 Ahirwar, R.N., Mishra, V.K., Chand, R., Budhlakoti, N., Mishra, D.C., Kumar, S., Singh, S., and Joshi, A.K.  
8 2018. Genome-wide association mapping of spot blotch resistance in wheat association  
9 mapping initiative (WAMI) panel of spring wheat (*Triticum aestivum* L.). *PLoS ONE* **13**,  
10 e0208196.
- 11 Akinsanmi, O.A., Backhouse, D., Simpfendorfer, S., and Chakraborty, S. 2006. Genetic diversity of  
12 Australian *Fusarium graminearum* and *F. pseudograminearum*. *Plant Pathology* **55**, 494-504.
- 13 Appels, R., Eversole, K., Stein, N., Feuillet, C., Keller, B., Rogers, J., Pozniak, C.J., Choulet, F., Distelfeld,  
14 A., Poland, J., Ronen, G., Sharpe, A.G., Barad, O., Baruch, K., Keeble-Gagnère, G., Mascher, M.,  
15 Ben-Zvi, G., Josselin, A.-A., Himmelbach, A., Balfourier, F., Gutierrez-Gonzalez, J., Hayden, M.,  
16 Koh, C., Muehlbauer, G., Pasam, R.K., Paux, E., Rigault, P., Tibbits, J., Tiwari, V., Spannagl, M.,  
17 Lang, D., Gundlach, H., Haberer, G., Mayer, K.F.X., Ormanbekova, D., Prade, V., Šimková, H.,  
18 Wicker, T., Swarbreck, D., Rimbart, H., Felder, M., Guilhot, N., Kaithakottil, G., Keilwagen, J.,  
19 Leroy, P., Lux, T., Twardziok, S., Venturini, L., Juhász, A., Abrouk, M., Fischer, I., Uauy, C., Borrill,  
20 P., Ramirez-Gonzalez, R.H., Arnaud, D., Chalabi, S., Chalhoub, B., Cory, A., Datla, R., Davey,  
21 M.W., Jacobs, J., Robinson, S.J., Steuernagel, B., Van Ex, F., Wulff, B.B.H., Benhamed, M.,  
22 Bendahmane, A., Concia, L., Latrasse, D., Bartoš, J., Bellec, A., Berges, H., Doležel, J., Frenkel,  
23 Z., Gill, B., Korol, A., Letellier, T., Olsen, O.-A., Singh, K., Valárik, M., Van Der Vossen, E., Vautrin,  
24 S., Weining, S., Fahima, T., Glikson, V., Raats, D., Číhalíková, J., Toegelová, H., Vrána, J.,  
25 Sourdille, P., Darrier, B., Barabaschi, D., Cattivelli, L., Hernandez, P., Galvez, S., Budak, H.,  
26 Jones, J.D.G., Witek, K., Yu, G., Small, I., et al. 2018. Shifting the limits in wheat research and  
27 breeding using a fully annotated reference genome. *Science* **361**, eaar7191.
- 28 Ayana, G.T., Ali, S., Sidhu, J.S., Hernandez, J.L.G., Turnipseed, B., and Sehgal, S.K. 2018. Genome-wide  
29 association study for spot blotch resistance in hard winter wheat. *Frontiers in Plant Science* **9**,  
30 926.
- 31 Bainsla, N.K., Phuke, R.M., He, X., Gupta, V., Bishnoi, S.K., Sharma, R.K., Ataei, N., Dreisigacker, S.,  
32 Juliana, P., and Singh, P.K. 2020. Genome-wide association study for spot blotch resistance in  
33 Afghan wheat germplasm. *Plant Pathology*.
- 34 Bovill, W.D., Horne, M., Herde, D.J., Davis, M., Wildermuth, G.B., and Sutherland, M.W. 2010.  
35 Pyramiding QTL increases seedling resistance to crown rot (*Fusarium pseudograminearum*) of  
36 wheat (*Triticum aestivum*). *Theoretical and Applied Genetics* **121**, 127-136.
- 37 Bovill, W.D., Ma, W., Ritter, K., Collard, B.C.Y., Davis, M., Wildermuth, G.B., and Sutherland, M.W. 2006.  
38 Identification of novel QTL for resistance to crown rot in the doubled haploid wheat  
39 population 'W21MMT70'×'Mendos'. *Plant Breeding* **125**, 538-543.
- 40 Buerstmayr, M., Steiner, B., and Buerstmayr, H. 2020. Breeding for *Fusarium* head blight resistance in  
41 wheat—progress and challenges. *Plant Breeding* **139**, 429-454.
- 42 Burgess, L.W., Backhouse, D., Summerell, B.A., and Swan, L.J. (2001). "Crown rot in wheat---Chapter  
43 20," in *Fusarium-Paul E Nelson Memorial Symposium*, eds. B.A. Summerell, J.F. Leslie, D.

- 1 Backhouse, W.L. Bryden & L.W. Burgess. (The American Phytopathological Society, St Paul:  
2 APS Press).
- 3 Cohen, S.P., and Leach, J.E. 2020. High temperature-induced plant disease susceptibility: more than  
4 the sum of its parts. *Current Opinion in Plant Biology*.
- 5 Collard, B.C.Y., Grams, R.A., Bovill, W.D., Percy, C.D., Jolley, R., Lehmensiek, A., Wildermuth, G., and  
6 Sutherland, M.W. 2005. Development of molecular markers for crown rot resistance in wheat:  
7 mapping of QTLs for seedling resistance in a '2-49'x'Janz' population. *Plant Breeding* **124**,  
8 532-537.
- 9 Collard, B.C.Y., Jolley, R., Bovill, W.D., Grams, R.A., Wildermuth, G.B., and Sutherland, M.W. 2006.  
10 Confirmation of QTL mapping and marker validation for partial seedling resistance to crown  
11 rot in wheat line '2-49'. *Crop & Pasture Science* **57**, 967-973.
- 12 Conner, R.L., Duczek, L.J., Kozub, G.C., and Kuzyk, A.D. 1996. Influence of crop rotation on common  
13 root rot of wheat and barley. *Canadian Journal of Plant Pathology* **18**, 247-254.
- 14 Erginbasorakci, G., Sehgal, D., Sohail, Q., Ogbonnaya, F.C., Dreisigacker, S., Pariyar, S.R., and Dababat,  
15 A.A. 2018. Identification of novel quantitative trait loci linked to crown rot resistance in spring  
16 wheat. *International Journal of Molecular Sciences* **19**, 2666.
- 17 Fabre, F., Rocher, F., Alouane, T., Langin, T., and Bonhomme, L. 2020. Searching for FHB resistances in  
18 bread wheat: susceptibility at the crossroad. *Frontiers in Plant Science* **11**.
- 19 Gupta, P.K., Chand, R., Vasistha, N.K., Pandey, S.P., Kumar, U., Mishra, V.K., and Joshi, A.K. 2018. Spot  
20 blotch disease of wheat: the current status of research on genetics and breeding. *Plant*  
21 *Pathology* **67**, 508-531.
- 22 Gurung, S., Mamidi, S., Bonman, J.M., Xiong, M., Brownguedira, G., and Adhikari, T.B. 2014.  
23 Genome-wide association study reveals novel quantitative trait loci associated with  
24 resistance to multiple leaf spot diseases of spring wheat. *PLoS ONE* **9**, e108179.
- 25 He, X., Dreisigacker, S., Sansaloni, C., Duveiller, E., Singh, R.P., and Singh, P.K. 2020. QTL mapping for  
26 spot blotch resistance in two bi-parental mapping populations of bread wheat.  
27 *Phytopathology*.
- 28 Jamil, M., Ali, A., Gul, A., Ghafoor, A., Ibrahim, A.M.H., and Mujeeb-Kazi, A. 2018. Genome-wide  
29 association studies for spot blotch (*Cochliobolus sativus*) resistance in bread wheat using  
30 genotyping-by-sequencing. *Phytopathology* **108**, 1307-1314.
- 31 Jin, J., Duan, S., Qi, Y., Yan, S., Li, W., Li, B., Xie, C., Zhen, W., and Ma, J. 2020. Identification of a novel  
32 genomic region associated with resistance to Fusarium crown rot in wheat. *Theoretical and*  
33 *Applied Genetics* **133**, 2063-2073.
- 34 Joshi, A.K., Kumar, S., Chand, R., and Ortizferrara, G. 2004. Inheritance of resistance to spot blotch  
35 caused by *Bipolaris sorokiniana* in spring wheat. *Plant Breeding* **123**, 213-219.
- 36 Kazan, K., and Gardiner, D.M. 2018. Fusarium crown rot caused by *Fusarium pseudograminearum* in  
37 cereal crops: recent progress and future prospects. *Molecular Plant Pathology* **19**, 1547-1562.
- 38 Krattinger, S.G., Lagudah, E.S., Spielmeyer, W., Singh, R.P., Huerta-Espino, J., Mcfadden, H., Bossolini, E.,  
39 Selter, L.L., and Keller, B. 2009. A putative ABC transporter confers durable resistance to  
40 multiple fungal pathogens in wheat. *Science* **323**, 1360-1363.
- 41 Kumar, J., Schafer, P., Huckelhoven, R., Langen, G., Baltruschat, H., Stein, E., Nagarajan, S., and Kogel, K.  
42 2002. *Bipolaris sorokiniana*, a cereal pathogen of global concern: cytological and molecular  
43 approaches towards better control. *Molecular Plant Pathology* **3**, 185-195.
- 44 Kumar, S., Roder, M.S., Singh, R.P., Kumar, S., Chand, R., Joshi, A.K., and Kumar, U. 2016. Mapping of

- 1 spot blotch disease resistance using NDVI as a substitute to visual observation in wheat  
2 (*Triticum aestivum* L.). *Molecular Breeding* **36**, 95.
- 3 Kumar, S., Roder, M.S., Tripathi, S.B., Kumar, S., Chand, R., Joshi, A.K., and Kumar, U. 2015.  
4 Mendelization and fine mapping of a bread wheat spot blotch disease resistance QTL.  
5 *Molecular Breeding* **35**, 218.
- 6 Kumar, U., Joshi, A.K., Kumar, S., Chand, R., and Roder, M.S. 2009. Mapping of resistance to spot blotch  
7 disease caused by *Bipolaris sorokiniana* in spring wheat. *Theoretical and Applied Genetics* **118**,  
8 783-792.
- 9 Kumar, U., Joshi, A.K., Kumar, S., Chand, R., and Roder, M.S. 2010. Quantitative trait loci for resistance  
10 to spot blotch caused by *Bipolaris sorokiniana* in wheat (*T. aestivum* L.) lines 'Ning 8201' and  
11 'Chirya 3'. *Molecular Breeding* **26**, 477-491.
- 12 Kumar, U., Kumar, S., Tyagi, K., Chand, R., and Joshi, A.K. 2005. Microsatellite markers for resistance to  
13 spot blotch in spring wheat. *Communications in Agricultural and Applied Biological Sciences*  
14 **70**, 59.
- 15 Li, H., Conner, R.L., Chen, Q., Li, H., Laroche, A., Graf, R.J., and Kuzyk, A.D. 2004. The transfer and  
16 characterization of resistance to common root rot from *Thinopyrum ponticum* to wheat.  
17 *Genome* **47**, 215-223.
- 18 Li, H.B., Xie, G.Q., Ma, J., Liu, G.R., Wen, S.M., Ban, T., Chakraborty, S., and Liu, C.J. 2010. Genetic  
19 relationships between resistances to *Fusarium* head blight and crown rot in bread wheat  
20 (*Triticum aestivum* L.). *Theoretical and Applied Genetics* **121**, 941-950.
- 21 Lillemo, M., Joshi, A.K., Prasad, R., Chand, R., and Singh, R.P. 2013. QTL for spot blotch resistance in  
22 bread wheat line Saar co-locate to the biotrophic disease resistance loci Lr34 and Lr46.  
23 *Theoretical and Applied Genetics* **126**, 711-719.
- 24 Liu, C., Ma, J., Li, H.B., Liu, Y.X., Liu, G.R., Wen, S.M., Zhou, M., Yan, G., and Chakraborty, S. 2018. The  
25 homoeologous regions on long arms of group 3 chromosomes in wheat and barley harbour  
26 major crown rot resistance loci. *Czech Journal of Genetics and Plant Breeding* **47**, 109-114.
- 27 Liu, C., and Ogonnaya, F.C. 2015. Resistance to *Fusarium* crown rot in wheat and barley: a review.  
28 *Plant Breeding* **134**, 365-372.
- 29 Lu, P., Liang, Y., Li, D.F., Wang, Z., Li, W., Wang, G., Wang, Y., Zhou, S., Wu, Q., and Xie, J. 2016. Fine  
30 genetic mapping of spot blotch resistance gene Sb3 in wheat (*Triticum aestivum*). *Theoretical  
31 and Applied Genetics* **129**, 577-589.
- 32 Ma, J., Li, H.B., Zhang, C., Yang, X.M., Liu, Y., Yan, G., and Liu, C. 2010. Identification and validation of a  
33 major QTL conferring crown rot resistance in hexaploid wheat. *Theoretical and Applied  
34 Genetics* **120**, 1119-1128.
- 35 Ma, J., Stiller, J., Zhao, Q., Feng, Q., Cavanagh, C.R., Wang, P., Gardiner, D.M., Choulet, F., Feuillet, C.,  
36 and Zheng, Y. 2014. Transcriptome and allele specificity associated with a 3BL locus for  
37 *Fusarium* crown rot resistance in bread wheat. *PLoS ONE* **9**, e113309.
- 38 Ma, J., Yan, G., and Liu, C. 2012a. Development of near-isogenic lines for a major QTL on 3BL  
39 conferring *Fusarium* crown rot resistance in hexaploid wheat. *Euphytica* **183**, 147-152.
- 40 Ma, J., Zhang, C.Y., Liu, Y.X., Yan, G.J., and Liu, C.J. 2012b. Enhancing *Fusarium* crown rot resistance of  
41 durum wheat by introgressing chromosome segments from hexaploid wheat. *Euphytica* **186**,  
42 67-73.
- 43 Martin, A., Bovill, W.D., Percy, C.D., Herde, D.J., Fletcher, S., Kelly, A., Neate, S.M., and Sutherland, M.W.  
44 2015. Markers for seedling and adult plant crown rot resistance in four partially resistant

- 1 bread wheat sources. *Theoretical and Applied Genetics* **128**, 377-385.
- 2 Monds, R.D., Cromey, M.G., Lauren, D.R., Menna, M.E.D., and Marshall, J.W. 2005. Fusarium  
3 graminearum, F. cortaderiae and F. pseudograminearum in New Zealand: molecular  
4 phylogenetic analysis, mycotoxin chemotypes and co-existence of species. *Fungal Biology* **109**,  
5 410-420.
- 6 Obanor, F., and Chakraborty, S. 2014. Aetiology and toxigenicity of Fusarium graminearum and F.  
7 pseudograminearum causing crown rot and head blight in Australia under natural and  
8 artificial infection. *Plant Pathology* **63**, 1218-1229.
- 9 Pariyar, S.R., Erginbasorakci, G., Dadshani, S., Chijioke, O.B., Leon, J., Dababat, A.A., and Grundler,  
10 F.M.W. 2020. Dissecting the genetic complexity of Fusarium crown rot resistance in wheat.  
11 *Scientific Reports* **10**, 1-13.
- 12 Peralta, A.L., Sun, Y., Mcdaniel, M.D., and Lennon, J.T. 2018. Crop rotational diversity increases disease  
13 suppressive capacity of soil microbiomes. *Ecosphere* **9**, e02235.
- 14 Poole, G.J., Smiley, R.W., Paulitz, T.C., Walker, C., Carter, A.H., See, D.R., and Garlandcampbell, K. 2012.  
15 Identification of quantitative trait loci (QTL) for resistance to Fusarium crown rot (Fusarium  
16 pseudograminearum) in multiple assay environments in the Pacific Northwestern US.  
17 *Theoretical and Applied Genetics* **125**, 91-107.
- 18 Rahman, M., Davies, P., Bansal, U., Pasam, R., Hayden, M., and Trethowan, R. 2020. Marker-assisted  
19 recurrent selection improves the crown rot resistance of bread wheat. *Molecular Breeding* **40**,  
20 28.
- 21 Sharma, R.C., and Duveiller, E. 2007. Advancement toward new spot blotch resistant wheats in South  
22 Asia. *Crop Science* **47**, 961-968.
- 23 Sharma, R.C., Duveiller, E., and Jacquemin, J.M. 2007. Microsatellite Markers Associated with Spot  
24 Blotch Resistance in Spring Wheat. *Journal of Phytopathology* **155**, 316-319.
- 25 Shi, S., Zhao, J., Pu, L., Sun, D., Han, D., Li, C., Feng, X., Fan, D., and Hu, X. 2020. Identification of new  
26 sources of resistance to crown rot and Fusarium head blight in Wheat. *Plant Disease* **104**,  
27 1979-1985.
- 28 Singh, P.K., He, X., Sansaloni, C., Juliana, P., Dreisigacker, S., Duveiller, E., Kumar, U., Joshi, A.K., and  
29 Singh, R.P. 2018. Resistance to Spot Blotch in Two Mapping Populations of Common Wheat Is  
30 Controlled by Multiple QTL of Minor Effects. *International Journal of Molecular Sciences* **19**,  
31 4054.
- 32 Singh, V., Singh, G., Chaudhury, A., Ojha, A., Tyagi, B.S., Chowdhary, A.K., and Sheoran, S. 2016.  
33 Phenotyping at hot spots and tagging of QTLs conferring spot blotch resistance in bread  
34 wheat. *Molecular Biology Reports* **43**, 1293-1303.
- 35 Smiley, R.W., Gourlie, J.A., Easley, S.A., and Patterson, L. 2005. Pathogenicity of fungi associated with  
36 the wheat crown rot complex in Oregon and Washington. *Plant Disease* **89**, 949-957.
- 37 Sun, C., Dong, Z., Zhao, L., Ren, Y., Zhang, N., and Chen, F. 2020. The Wheat 660K SNP array  
38 demonstrates great potential for marker - assisted selection in polyploid wheat. *Plant*  
39 *Biotechnology Journal*.
- 40 Tembo, B., Sibiya, J., Tongoona, P., and Tembo, L. 2017. Validation of microsatellite molecular markers  
41 linked with resistance to Bipolaris sorokiniana in wheat (Triticum aestivum L.). *The Journal of*  
42 *Agricultural Science* **155**, 1061-1068.
- 43 Tomar, V., Singh, R.P., Poland, J., Singh, D., Joshi, A.K., Singh, P.K., Bhati, P.K., Kumar, S., Rahman, M.,  
44 Dhillon, G.S., Tiwari, B.S., and Kumar, U. 2020. Genome-wide association study and genomic

- 1 prediction of spot blotch disease in wheat (*Triticum aestivum* L.) using genotyping by  
2 sequencing. *Research Square Preprint*.
- 3 Wallwork, H., Butt, M., Cheong, J., and Williams, K.J. 2004. Resistance to crown rot in wheat identified  
4 through an improved method for screening adult plants. *Australasian Plant Pathology* **33**,  
5 1-7.
- 6 Wang, H., Sun, S., Ge, W., Zhao, L., Hou, B., Wang, K., Lyu, Z., Chen, L., Xu, S., Guo, J., Li, M., Su, P., Li, X.,  
7 Wang, G., Bo, C., Fang, X., Zhuang, W., Cheng, X., Wu, J., Dong, L., Chen, W., Li, W., Xiao, G.,  
8 Zhao, J., Hao, Y., Xu, Y., Gao, Y., Liu, W., Liu, Y., Yin, H., Li, J., Li, X., Zhao, Y., Wang, X., Ni, F., Ma,  
9 X., Li, A., Xu, S.S., Bai, G., Nevo, E., Gao, C., Ohm, H., and Kong, L. 2020. Horizontal gene  
10 transfer of Fhb7 from fungus underlies Fusarium head blight resistance in wheat. *Science*  
11 **368**, eaba5435.
- 12 Wang, J., Wang, X., Xu, M., Feng, G., Zhang, W., Yang, X., and Huang, S. 2015. Contributions of wheat  
13 and maize residues to soil organic carbon under long-term rotation in north China. *Scientific*  
14 *Reports* **5**, 11409.
- 15 William, M., Singh, R.P., Huertaespino, J., Islas, S.O., and Hoisington, D.A. 2003. Molecular marker  
16 mapping of leaf rust resistance gene Lr46 and its association with stripe rust resistance gene  
17 Yr29 in wheat. *Phytopathology* **93**, 153-159.
- 18 Yang, X., Ma, J., Li, H., Ma, H., Yao, J., and Liu, C. 2010. Different genes can be responsible for crown rot  
19 resistance at different developmental stages of wheat and barley. *European Journal of Plant*  
20 *Pathology* **128**, 495-502.
- 21 Yang, X., Pan, Y., Singh, P.K., He, X., Ren, Y., Zhao, L., Zhang, N., Cheng, S., and Chen, F. 2019.  
22 Investigation and genome-wide association study for Fusarium crown rot resistance in  
23 Chinese common wheat. *BMC Plant Biology* **19**, 153.
- 24 Zhang, P., Guo, G., Wu, Q., Chen, Y., Xie, J., Lu, P., Li, B., Dong, L., Li, M., Wang, R., Yuan, C., Zhang, H.,  
25 Zhu, K., Li, W., and Liu, Z. 2020. Identification and fine mapping of spot blotch (*Bipolaris*  
26 *sorokiniana*) resistance gene Sb4 in wheat. *Theoretical and Applied Genetics* **133**.
- 27 Zhao, R., Chen, X., Zhang, F., Zhang, H., Schroder, J.L., and Romheld, V. 2006. Fertilization and nitrogen  
28 balance in a wheat–maize rotation system in North China. *Agronomy Journal* **98**, 938-945.
- 29 Zheng, Z., Kilian, A., Yan, G., and Liu, C. 2014. QTL conferring fusarium crown rot resistance in the elite  
30 bread wheat variety EGA Wylie. *PLoS ONE* **9**, e96011.
- 31 Zheng, Z., Ma, J., Stiller, J., Zhao, Q., Feng, Q., Choulet, F., Feuillet, C., Zheng, Y., Wei, Y., and Han, B.  
32 2015. Fine mapping of a large-effect QTL conferring Fusarium crown rot resistance on the  
33 long arm of chromosome 3B in hexaploid wheat. *BMC Genomics* **16**, 850-850.
- 34 Zhou, H., He, X., Wang, S., Ma, Q., Sun, B., Ding, S., Chen, L., Zhang, M., and Li, H. 2019. Diversity of  
35 the Fusarium pathogens associated with crown rot in the Huanghuai wheat - growing region  
36 of China. *Environmental Microbiology* **21**, 2740-2754.
- 37 Zhu, Z., Bonnett, D., Ellis, M., Singh, P.K., Heslot, N., Dreisigacker, S., Gao, C., and Mujeebkazi, A. 2014.  
38 Mapping resistance to spot blotch in a CIMMYT synthetic-derived bread wheat. *Molecular*  
39 *Breeding* **34**, 1215-1228.
- 40

**Table 1. Genetic bases of wheat resistance to common root rot (spot blotch).**

| QTL name              | Associated markers or SNPs                                                                                | Resistant wheat germplasms                                                                                                                                     | Reference                                                                       |
|-----------------------|-----------------------------------------------------------------------------------------------------------|----------------------------------------------------------------------------------------------------------------------------------------------------------------|---------------------------------------------------------------------------------|
| <i>Sb1/Lr34*</i>      | 7DS: <i>Xgwm295</i> , csLV34                                                                              | Saar                                                                                                                                                           | (Lillemo et al., 2013)                                                          |
| <i>Qsb</i>            | 7DS: <i>wPt-7654</i> , <i>gdm88</i>                                                                       |                                                                                                                                                                |                                                                                 |
| <i>Qsb/Lr46/Yr29*</i> | 1BL: <i>wmc719</i> , <i>hbe248</i> , <i>ncw1-V</i>                                                        |                                                                                                                                                                |                                                                                 |
| <i>Sb2/Tsn1*</i>      | 5BL: <i>Xgwm499</i> , <i>Xgwm639</i> , <i>Xgwm1043</i>                                                    | YS116, CASCABEL                                                                                                                                                | (Kumar et al., 2015; Kumar et al., 2016; Bainsla et al., 2020; He et al., 2020) |
| <i>Sb3*</i>           | 3BS: <i>Xbarc147</i> , <i>XWGGC3957</i> , <i>XWGGC4320</i>                                                | 621-7-1                                                                                                                                                        | (Lu et al., 2016)                                                               |
| <i>Sb4*</i>           | 4B: <i>TraesCS4B01G295400.1</i>                                                                           | Zhongyu1211, GY17                                                                                                                                              | (Zhang et al., 2020)                                                            |
| <i>Qsb</i>            | 5B: <i>Xgwm544</i><br>7D: <i>Xgwm437</i>                                                                  | Yangmai 6                                                                                                                                                      | (Kumar et al., 2005)                                                            |
| <i>Qsb</i>            | 5B: <i>Xgwm67</i>                                                                                         | G162                                                                                                                                                           | (Sharma et al., 2007)                                                           |
| <i>Qsb.bhu-2A</i>     | 2AL: <i>Xbarc353</i> , <i>Xgwm445</i>                                                                     | Yangmai 6                                                                                                                                                      | (Kumar et al., 2009)                                                            |
| <i>Qsb.bhu-2B</i>     | 2BS: <i>Xgwm148</i> , <i>Xgwm374</i>                                                                      |                                                                                                                                                                |                                                                                 |
| <i>Qsb.bhu-5B</i>     | 5BL: <i>Xgwm067</i> , <i>Xgwm371</i>                                                                      |                                                                                                                                                                |                                                                                 |
| <i>Qsb.bhu-6D</i>     | 6DL: <i>Xbarc175</i> , <i>Xgwm732</i>                                                                     |                                                                                                                                                                |                                                                                 |
| <i>Qsb.bhu-2A</i>     | 2AS: <i>Xgwm425</i> , <i>Xbarc159</i>                                                                     | Ning 8201                                                                                                                                                      | (Kumar et al., 2010)                                                            |
| <i>Qsb.bhu-2B</i>     | 2BS: <i>Xgwm148</i> , <i>Xbarc91</i>                                                                      |                                                                                                                                                                |                                                                                 |
| <i>Qsb.bhu-5B</i>     | 5BL: <i>Xgwm067</i> , <i>Xgwm213</i>                                                                      |                                                                                                                                                                |                                                                                 |
| <i>Qsb.bhu-7D</i>     | 7DS: <i>Xgwm111</i> , <i>Xgwm1168</i>                                                                     |                                                                                                                                                                |                                                                                 |
| <i>Qsb.bhu-2B</i>     | 2BS: <i>Xgwm148</i> , <i>Xgwm129</i>                                                                      | Chirya 3                                                                                                                                                       | (Kumar et al., 2010)                                                            |
| <i>Qsb.bhu-2D</i>     | 2DS: <i>Xgwm455</i> , <i>Xgwm815</i>                                                                      |                                                                                                                                                                |                                                                                 |
| <i>Qsb.bhu-3B</i>     | 3BS: <i>Xgwm533</i> , <i>Xgwm1037</i>                                                                     |                                                                                                                                                                |                                                                                 |
| <i>Qsb.bhu-7B</i>     | 7BS: <i>Xgwm263</i> , <i>Xgwm255</i>                                                                      |                                                                                                                                                                |                                                                                 |
| <i>Qsb.bhu-7D</i>     | 7DS: <i>Xgwm111</i> , <i>Xswm008</i>                                                                      |                                                                                                                                                                |                                                                                 |
| <i>Qsb.cim-1B</i>     | 1B: <i>Xwmc128</i> , <i>Xgwm374</i>                                                                       | SYN1, Mayoora, Tksn1081/Ae. squarrosa (222)                                                                                                                    | (Zhu et al., 2014)                                                              |
| <i>Qsb.cim-3B</i>     | 3B: <i>990937 F 0</i> , <i>1123330 F 0</i>                                                                |                                                                                                                                                                |                                                                                 |
| <i>Qsb.cim-5A</i>     | 5A: <i>1086218 F 0</i> , <i>982608 F 0</i>                                                                |                                                                                                                                                                |                                                                                 |
| <i>Qsb.iwbr-7B</i>    | 7BL: <i>wmc758</i> , <i>wmc335</i>                                                                        | BH 1146                                                                                                                                                        | (Singh et al., 2016)                                                            |
| <i>Qsb.iwbr-7D</i>    | 7DL: <i>wmc653</i> , <i>barc121</i>                                                                       |                                                                                                                                                                |                                                                                 |
| <i>Qsb/Vrn-A1*</i>    | 5AL: <i>Vrn-A1</i>                                                                                        | BARTAI, WUYA, CASCABEL, KATH                                                                                                                                   | (Singh et al., 2018; Bainsla et al., 2020; He et al., 2020)                     |
| <i>Qsb</i>            | 1A: <i>wPt-730148</i> , <i>wPt-668214</i><br>3B: <i>wPt-1159</i> , <i>wPt-5769</i><br>7B: <i>wPt-2838</i> | Chirya 7, Forma Vinda de Varmland (PI 192569), IWA8600074 (PI 623098), Trigo (PI 477878), Soprino (PI 479890), CI 10112 (PI 78814), Florentino (PI 565255), AW | (Adhikari et al., 2012)                                                         |

|                                                                                                                                              |                                                                                                                                                                                                                                                                                                   |                                                                                                                                                                                                                                      |                        |
|----------------------------------------------------------------------------------------------------------------------------------------------|---------------------------------------------------------------------------------------------------------------------------------------------------------------------------------------------------------------------------------------------------------------------------------------------------|--------------------------------------------------------------------------------------------------------------------------------------------------------------------------------------------------------------------------------------|------------------------|
|                                                                                                                                              | 7D: <i>wPt-664459</i>                                                                                                                                                                                                                                                                             | 6635A/86 (PI 572693), IWA8611737 (PI 625572), NW56A (PI 429667)                                                                                                                                                                      |                        |
| <i>Qsb</i>                                                                                                                                   | 1B: <i>w SNP_ Ex_ c24700_33953160</i><br>5A: <i>w SNP_ Ex_ c15342_23592740, w SNP_ Ku_ c17951_27138894</i><br>5B: <i>w SNP_ Ex_ rep_ c70120_69069789, w SNP_ Ku_ c20701_30355248</i><br>6B: <i>w SNP_ Ex_ c15785_24157360</i><br>7B: <i>w SNP_ Ex_ c52527_56097039</i>                            | PI25989, PI384237, PI384239, PI479802, PI479890, PI576639, PI245377, PI366685, PI481715, PI624517, PI481574, PI91235, PI350795, PI565213                                                                                             | (Gurung et al., 2014)  |
| <i>Qsb</i>                                                                                                                                   | 5B: <i>Xgwm544</i><br>6A: <i>Xgwm570</i><br>7D: <i>Xgwm437</i>                                                                                                                                                                                                                                    | 19HRWSN6, 30SAWSN5                                                                                                                                                                                                                   | (Tembo et al., 2017)   |
| <i>Qsb.sdsu-2D.1</i><br><i>Qsb.sdsu-3A.1</i><br><i>Qsb.sdsu-4A.1</i><br><i>Qsb.sdsu-4B.1</i><br><i>Qsb.sdsu-5A.1</i><br><i>Qsb.sdsu-7B.1</i> | 2D: <i>Kukri_c31121_1460</i><br>3A: <i>Excalibur_c46082_440</i><br>4A: <i>IWA8475</i><br>4B: <i>Excalibur_rep_c79414_306</i><br>5A: <i>Kukri_rep_c104877_2166</i><br>7B: <i>TA005844-0160</i>                                                                                                     | Duster, Colt, Custer, Intrada, MT0495, NE99495, OK04525, OK05122, OK05723W, Venango                                                                                                                                                  | (Ayana et al., 2018)   |
| <i>Qsb</i>                                                                                                                                   | 1A: <i>S1A_582293281</i><br>2A: <i>S2A_16824871</i><br>3A: <i>S3A_378506623</i><br>4B: <i>S4B_554842477</i><br>5A: <i>S5A_50162259</i><br>5B: <i>S5B_513590441, S5B_504309131, S5B_528990456</i><br>6B: <i>S6B_9296088, S6B_673978653</i><br>7A: <i>S7A_483878120</i><br>7B: <i>S7B_749474154</i> | Chirya.3, Aust-53, Pak-13, SB12-6704, 7HTWSN-4516, 7HTWSN-4513, Aust-8, SB12-6703, Aust-66, SB12-6720, Aust-12, 7HTWSN-4522, 7HTWSN-4526, 7HTWSN-4412, 7HTWSN-4405, 7HTWSN-4517, H.Sat-8, Aust-59, Aust-29, 7HTWSN-4406, 7HTWSN-4510 | (Jamil et al., 2018)   |
| <i>Qsb</i>                                                                                                                                   | 1B: <i>BobWhite_c17559_105</i><br>4A: <i>BobWhite_c20322_153, BobWhite_c17524_242</i><br>5B: <i>Tdurum_contig25513_123, tplb0027f13_1493</i><br>6A: <i>w SNP_ Ra_ c2270_4383252</i><br>6B: <i>BS00092845_51</i><br>7A: <i>Ku_c15750_761</i>                                                       | N. A.                                                                                                                                                                                                                                | (Ahirwar et al., 2018) |
| <i>Qsb</i>                                                                                                                                   | 1B: <i>TraesCS1B01G416200</i><br>5A: <i>TraesCS5A01G391400, TraesCS5A01G369700</i>                                                                                                                                                                                                                | OKATIA, DE9, OK82282//BOW/NKT/3/F4105, PSN/BOW//ROEK/3/MILAN, KAUZ 2*/OPATA//KAUZ, ALTAR84/AE.SQ//2*, CNDO/R143//ENTE/MEXI-2/3/..., PAMIR-94 x, NING9415, RENESANSA, VORONA/CUPE                                                     | (Bainsla et al., 2020) |
| <i>Qsb</i>                                                                                                                                   | 1A: <i>TraesCS1A01G018700</i><br>1B: <i>TraesCS1B01G424000, TraesCS1B01G423900</i>                                                                                                                                                                                                                | N. A.                                                                                                                                                                                                                                | (Tomar et al., 2020)   |



---

1D: *TraesCS1D01G012500*, *TraesCS1D01G012900*  
2B: *TraesCS2B01G505200*, *TraesCS2B01G552700*,  
*TraesCS2B01G12400*, *TraesCS2B01G30100*  
3A: *TraesCS3A01G107400*, *TraesCS3A01G103000*  
3B: *TraesCS3B01G520100*  
3D: *TraesCS3D01G537500*  
5A: *TraesCS5A01G402700*, *TraesCS5A01G457100*  
5B: *TraesCS5B01G066200*, *TraesCS5B01G224500*,  
*TraesCS5B01G521500*  
6A: *TraesCS6A01G061900*  
7A: *TraesCS7A01G504700*, *TraesCS7A01G530700*  
7B: *TraesCS7B01G002400*, *TraesCS7B01G003000*,  
*TraesCS7B01G169400*  
7D: *TraesCS7D01G067000*, *TraesCS7D01G081100*,  
*TraesCS7D01G221000*

---

Genomic distribution of all these summarized resistant loci were drafted using associated markers and SNPs (bold labeled) that can be found in “Chinese Spring” wheat genome database. QTLs with major effect or linked with designated genes were labeled with asterisk (\*) and highlighted in **Fig. 2**.

**Table 2. Genetic loci controlling wheat resistance to *Fusarium* crown rot.**

| QTL name             | Associated markers or SNPs                                                                                                                                                                                                                                                                                                                                      | Resistant wheat germplasms                | Reference                                                                                                     |
|----------------------|-----------------------------------------------------------------------------------------------------------------------------------------------------------------------------------------------------------------------------------------------------------------------------------------------------------------------------------------------------------------|-------------------------------------------|---------------------------------------------------------------------------------------------------------------|
| <i>Qcrs.cpi-3B*</i>  | 3BL: <i>Xgwm0181</i> , <i>wPt-10505</i> , <i>wPt-2277</i>                                                                                                                                                                                                                                                                                                       | CSCR6 ( <i>T. spelta</i> ), Lang, Kennedy | (Ma et al., 2010; Yang et al., 2010; Ma et al., 2012a; Ma et al., 2012b; Ma et al., 2014; Zheng et al., 2015) |
| <i>Qcsr.cpi-4B</i>   | 4BS: <i>wPt-5334</i> , <i>wPt-4918</i> , <i>Xbarc199</i>                                                                                                                                                                                                                                                                                                        |                                           |                                                                                                               |
| <i>Qcr</i>           | 5A: <i>Xwmc110</i>                                                                                                                                                                                                                                                                                                                                              |                                           |                                                                                                               |
| <i>Qcr</i>           | 6B: <i>Xwmc494</i> , <i>Xgwm193</i> , <i>Xwmc397</i> , <i>Xbarc198</i> , <i>Xbarc178</i>                                                                                                                                                                                                                                                                        |                                           |                                                                                                               |
| <i>Qcr</i>           | 2BS: <i>Xgdm086</i> , <i>Xbarc200</i><br>2D: <i>Xwmc018</i> , <i>Xwmc190</i><br>5D: <i>Xbarc205</i> , <i>barc143</i>                                                                                                                                                                                                                                            | W21MMT70, Mendos                          | (Bovill et al., 2006)                                                                                         |
| <i>Qcr</i>           | 1AL: <i>Xwmc120</i> , <i>Xwmc312</i>                                                                                                                                                                                                                                                                                                                            | Kukri, 2-49 (Gluyas Early/Gala), Janz     | (Wallwork et al., 2004; Collard et al., 2005; Collard et al., 2006)                                           |
| <i>QCr.usq-1D.1</i>  | 1DS: <i>Xcfd19</i>                                                                                                                                                                                                                                                                                                                                              |                                           |                                                                                                               |
| <i>QCr.usq-2B.1</i>  | 2BS: <i>Xbarc349.1</i> , <i>Xgwm388</i>                                                                                                                                                                                                                                                                                                                         |                                           |                                                                                                               |
| <i>Qcr/Rht1*</i>     | 4BL: <i>Xgwm165</i> , <i>Xgwm251</i><br><i>Qcr</i><br>7BS: <i>Xgwm400</i> , <i>Xwmc476</i>                                                                                                                                                                                                                                                                      |                                           |                                                                                                               |
| <i>QCr.usq-1D.1</i>  | 1DS: <i>wPt-3738</i> , <i>Xcfd19</i> , <i>wPt-9380</i>                                                                                                                                                                                                                                                                                                          | 2-49, W21MMT70, Sunto                     | (Bovill et al., 2010)                                                                                         |
| <i>QCr.usq-2B.2</i>  | 2B: <i>wPt-5374</i> , <i>wPt-0434</i>                                                                                                                                                                                                                                                                                                                           |                                           |                                                                                                               |
| <i>QCr.usq-3B.1</i>  | 3BL: <i>wPt-7301</i> , <i>wPt-0365</i>                                                                                                                                                                                                                                                                                                                          |                                           |                                                                                                               |
| <i>QCr.usq-4B.1</i>  | 4BS: <i>wPt-4535</i> , <i>Xgwm251</i><br><i>Qcr</i><br>7AS: <i>wPt-4748</i> , <i>wPt-8418</i>                                                                                                                                                                                                                                                                   |                                           |                                                                                                               |
| <i>Qcr</i>           | 3B: <i>wPt-1834</i> , <i>wPt-1151</i>                                                                                                                                                                                                                                                                                                                           | 2-49, Aso zairai 11, Ernie                | (Li et al., 2010)                                                                                             |
| <i>Qcrs.wsu-3BL</i>  | 3BL: <i>Xgwm247</i> , <i>Xgwm299</i>                                                                                                                                                                                                                                                                                                                            | Sunco, Macon, Otis                        | (Poole et al., 2012)                                                                                          |
| <i>Qcr</i>           | 3BS: <i>wPt-5390</i> , <i>Xwmc777</i>                                                                                                                                                                                                                                                                                                                           |                                           |                                                                                                               |
| <i>Qcr</i>           | 7AS: <i>wPt-3702</i>                                                                                                                                                                                                                                                                                                                                            |                                           |                                                                                                               |
| <i>Qcrs.cpi-2D</i>   | 2DL: <i>1131013 F 0</i> , <i>1246993 F 0</i>                                                                                                                                                                                                                                                                                                                    | EGA Wylie                                 | (Zheng et al., 2014)                                                                                          |
| <i>Qcrs.cpi-4B.1</i> | 4BS: <i>100004319 F 0</i> , <i>2324159 F 0</i>                                                                                                                                                                                                                                                                                                                  |                                           |                                                                                                               |
| <i>Qcrs.cpi-4B.2</i> | 4BS: <i>1108472 F 0</i> , <i>1093616 F 0</i>                                                                                                                                                                                                                                                                                                                    |                                           |                                                                                                               |
| <i>Qcrs.cpi-5D</i>   | 5DS: <i>1215315 F 0</i> , <i>1237596 F 0</i>                                                                                                                                                                                                                                                                                                                    |                                           |                                                                                                               |
| <i>Qcr</i>           | 1AS: <i>Xbarc148</i> , <i>Xgwm164</i><br>1BS: <i>Xcfd65</i> , <i>Xgwm11</i><br>1DL: <i>Xcfd19</i> , <i>Xwmc216</i><br>2A: <i>Xgwm95</i> , <i>Xcfa2043</i><br>2B: <i>Xgwm630</i> , <i>Xcfa2278</i><br>2DS: <i>Xgwm484</i> , <i>Xgwm102</i><br>3AL: <i>Xcfa2134</i> , <i>Xcfa2262</i><br>3BL: <i>Xgwm299</i> , <i>wPt-0021</i> , <i>Xwmc236</i> , <i>wPt-0365</i> | 2-49, Sunco, IRN497, CPI133817            | (Martin et al., 2015)                                                                                         |

|                                                                                                                                                                                   |                                                                                                                                                                                                                                                                                                                                                                                                                                                                                                                                                                               |                                                                                                                                                                                                                     |                               |
|-----------------------------------------------------------------------------------------------------------------------------------------------------------------------------------|-------------------------------------------------------------------------------------------------------------------------------------------------------------------------------------------------------------------------------------------------------------------------------------------------------------------------------------------------------------------------------------------------------------------------------------------------------------------------------------------------------------------------------------------------------------------------------|---------------------------------------------------------------------------------------------------------------------------------------------------------------------------------------------------------------------|-------------------------------|
|                                                                                                                                                                                   | 4BS: <i>Xwmc467</i> , <i>Xgwm165</i><br>4BS: <b><i>Xbarc193</i></b> , <i>Xwmc349</i><br>6DL: <i>Xcfd188</i> , <b><i>Xcfd47</i></b><br>6DL: <i>Xbarc196</i> , <b><i>Xbarc273</i></b>                                                                                                                                                                                                                                                                                                                                                                                           |                                                                                                                                                                                                                     |                               |
| <i>Qcr</i>                                                                                                                                                                        | 2DS: <b><i>wPt-669517</i></b><br>3BS: <i>wPt-2193</i> , <i>wPt-22988</i> , <i>wPt-732330</i> , <b><i>wPt-2766</i></b>                                                                                                                                                                                                                                                                                                                                                                                                                                                         | 2-49, Sunco, Altay-2000                                                                                                                                                                                             | (Erginbasorakci et al., 2018) |
| <i>QFCR.heau-2A</i><br><i>QFCR.heau-2D</i><br><b><i>Qcr-6AL*</i></b><br><i>QFCR.heau-6A</i><br><i>Qcr-6B</i><br><i>Qcr-6D</i>                                                     | 2AS: <i>Xwms382</i> , <i>wPt-7462</i> , <i>wPt-3757</i><br>2DS: <b><i>Xcfd53</i></b><br>6AL: <b><i>AX-111106634</i></b> , <i>AX-94534539</i><br>6AS: <b><i>Xbarc3</i></b> , <i>Xwmc754</i><br>6B: <b><i>SNP position 534,514,143</i></b><br>6D: <b><i>SNP position 354,819,336</i></b>                                                                                                                                                                                                                                                                                        | Xunmai 118, Kaimai 26, Yanke 316, Xuke 732, Zhonglemai 9, Jinmai 1, Shenzhou 209, Fannong 1, Jiyanmai 7, UC1110, PI610750                                                                                           | (Yang et al., 2019)           |
| <i>Qcr</i><br><i>Qcr</i><br><i>Qcr</i><br><i>Qcr</i><br><i>Qcr</i><br><b><i>Qcr-5DL*</i></b><br><i>Qcr</i><br><i>Qcr</i>                                                          | 1BS: <b><i>Affx-88612017</i></b> , <b><i>Affx-109495423</i></b><br>1DS: <b><i>Affx-92108178</i></b> , <b><i>Affx-109205872</i></b><br>2AL: <b><i>Affx-111557509</i></b><br>5DS: <b><i>Affx-88597504</i></b> , <b><i>Affx-110248324</i></b><br>5AL: <b><i>Affx-109253960</i></b><br>5DL: <b><i>Affx-110484766</i></b> , <b><i>Affx-110079634</i></b><br>6BS: <b><i>Affx-110282972</i></b><br>7BL: <b><i>Affx-109846651</i></b> , <b><i>Affx-109540847</i></b>                                                                                                                  | Henong 982, Shiyou 17, Bao 6818, Quanmai 890, 04 Zhong 36, Junda 129, Xu 10054, Fanmai 5, Lian 0809, Shixin 733, Shi05-6678, Han 06-5170, Luomai 8, Zhongyuanzhixing, Yangao 21, Xumai 33                           | (Jin et al., 2020)            |
| <i>Qcr</i><br><i>Qcr</i><br><b><i>Qcr/Fhb1*</i></b><br><i>Qcr</i><br><i>Qcr</i><br><i>Qcr</i><br><i>Qcr</i><br><i>Qcr</i><br><i>Qcr</i><br><i>Qcr</i><br><i>Qcr</i><br><i>Qcr</i> | 2AL: <i>Kukri_c57491_156</i><br>3AS: <b><i>wsnp_Ra_c16278_24893033</i></b> , <b><i>CAP8_c1393_327</i></b><br>3BS: <b><i>CAP12_rep_c3868_270</i></b><br>3DL: <b><i>wsnp_Ex_c14027_21925404</i></b><br>4BS: <b><i>wsnp_Ku_c12399_20037334</i></b><br>4BL: <b><i>RAC875_rep_c72961_977</i></b><br>5BS: <b><i>wsnp_Ku_c17875_27051169</i></b> , <b><i>Excalibur_c23304_353</i></b><br>5DS: <b><i>RAC875_rep_c111521_246</i></b><br>5DL: <b><i>Excalibur_c2795_1518</i></b><br>6BS: <i>RAC875_c17297_341</i><br>6BL: <b><i>BobWhite_c19298_97</i></b><br>6DS: <i>BS00021881_51</i> | VICTORYA, Katea, KOLLEGA,<br>DORADE-5/3/BOW"S"/GEN//SHAHI,<br>2180*K/2163//?/3/W1062A*HVA114/W3416, L 4224 K 12,<br>NE04424,<br>TX69A509.2//BBY/FOX/3/GRK//NO64/PEX/4/CER/5/KAUZ//ALTA<br>R 84/AOS, ID800994.W/MO88 | (Pariyar et al., 2020)        |
| <i>Qcr</i>                                                                                                                                                                        | 1A: <b><i>BobWhite_c1027_1127</i></b> , <b><i>wsnp_Ku_c183_358844</i></b><br>1B: <b><i>BS00070139_51</i></b> , <b><i>Tdurum_contig13117_1316</i></b><br>1D: <b><i>wsnp_Ex_c3372_6195001</i></b><br>2D: <b><i>BS00062567_51</i></b><br>3B: <b><i>BS00072994_51</i></b> , <b><i>BS00079029_51</i></b> , <b><i>IACX11310</i></b>                                                                                                                                                                                                                                                 | AUS29529/2/2.49/Cunningham//Kennedy/3/Sunco,<br>CSCR16/2/2.49/Cunningham//Kennedy/3/Sunco/2*Pastor                                                                                                                  | (Rahman et al., 2020)         |

|       |       |                                                                                                                                                                                                                            |                    |
|-------|-------|----------------------------------------------------------------------------------------------------------------------------------------------------------------------------------------------------------------------------|--------------------|
|       |       | 4A: <i>BS00035307_51</i>                                                                                                                                                                                                   |                    |
|       |       | 4B: <i>Ku_c3385_521</i>                                                                                                                                                                                                    |                    |
|       |       | 5B: <i>BS00032003_51</i> , <i>BobWhite_c6094_447</i>                                                                                                                                                                       |                    |
|       |       | 6B: <i>RAC875_c60007_199</i>                                                                                                                                                                                               |                    |
|       |       | 7A: <i>BobWhite_c33300_159</i> , <i>wsnp_JD_c1219_1766041</i>                                                                                                                                                              |                    |
|       |       | 7B: <i>wsnp_be352570B-Ta_2_1</i>                                                                                                                                                                                           |                    |
| N. A. | N. A. | Cunmai633, LS4607, Pubing01, Hongyun2, Jimai216, Fengyunmai5,<br>Huaihe15076, Luofeng2419, Yanfeng168, Zhengmai22, Zhoumai38,<br>Zhoumai37, Lemai185, Xinmai38, Xinong733, Xinmai45,<br>Guohemai12, Xinong625, Zhengmai162 | (Shi et al., 2020) |

Genomic distribution of all these summarized resistant loci were drafted using associated markers and SNPs (bold labeled) that can be found in “Chinese Spring” wheat genome database. QTLs with major effect or linked with designated genes were labeled with asterisk (\*) and highlighted in **Fig. 3**.

## Figure legends

### **Fig. 1 Pathogenic profiles of *Bipolaris sorokiniana* and *Fusarium pseudograminearum*. (A)**

*B. sorokiniana* cultivated on PDA (potato dextrose agar) medium. Spores were directly collected from *B. sorokiniana* cultures on PDA medium. **(B)** Common root rot and spot blotch caused by *B. sorokiniana*. Infected wheat plants can be easily pulled out, the stem base and root system feel wet, and black and brown striped spots can be observed in both the stem base and lower leaves. **(C)** *F. pseudograminearum* cultivated on PDA medium. Spores of *F. pseudograminearum* can be induced on CMC (carboxymethyl cellulose sodium) medium. **(D)** *Fusarium* crown rot caused by *F. pseudograminearum*. The stem base of an infected wheat plant is dry and fragile, so can be easily broken apart. Additionally, dark and red brown rot can be observed in the stem base. Scale bar = 20  $\mu\text{m}$ .

### **Fig. 2 Genetic determinants of wheat resistance to common root rot (spot blotch).**

Molecular markers, SNPs, and genes associated with common root rot or spot blotch resistant QTLs were collected from previous publications and searched against the JBrowse-1.12.3-release of common wheat “Chinese Spring” genome available from the “Triticeae Multi-omics Center (<http://202.194.139.32/>)”. Physical positions were used to generate a distribution map of all the collected QTLs using Mapchart v2.32 software. QTLs with major effect or linked with designated genes are highlighted in red. Detailed information for these QTLs can be found in **Table 1**.

### **Fig. 3 Genetic loci controlling wheat resistance to *Fusarium* crown rot.**

Molecular markers, SNPs, and genes associated with FCR-resistant QTLs were collected from previous publications and searched against the JBrowse-1.12.3-release of common wheat “Chinese Spring” genome available from the “Triticeae Multi-omics Center (<http://202.194.139.32/>)”. Physical positions were used to generate a distribution map of all the collected QTLs using Mapchart v2.32 software. QTLs with major effect or linked with designated genes are highlighted in red. Detailed information for these QTLs can be found in **Table 2**.

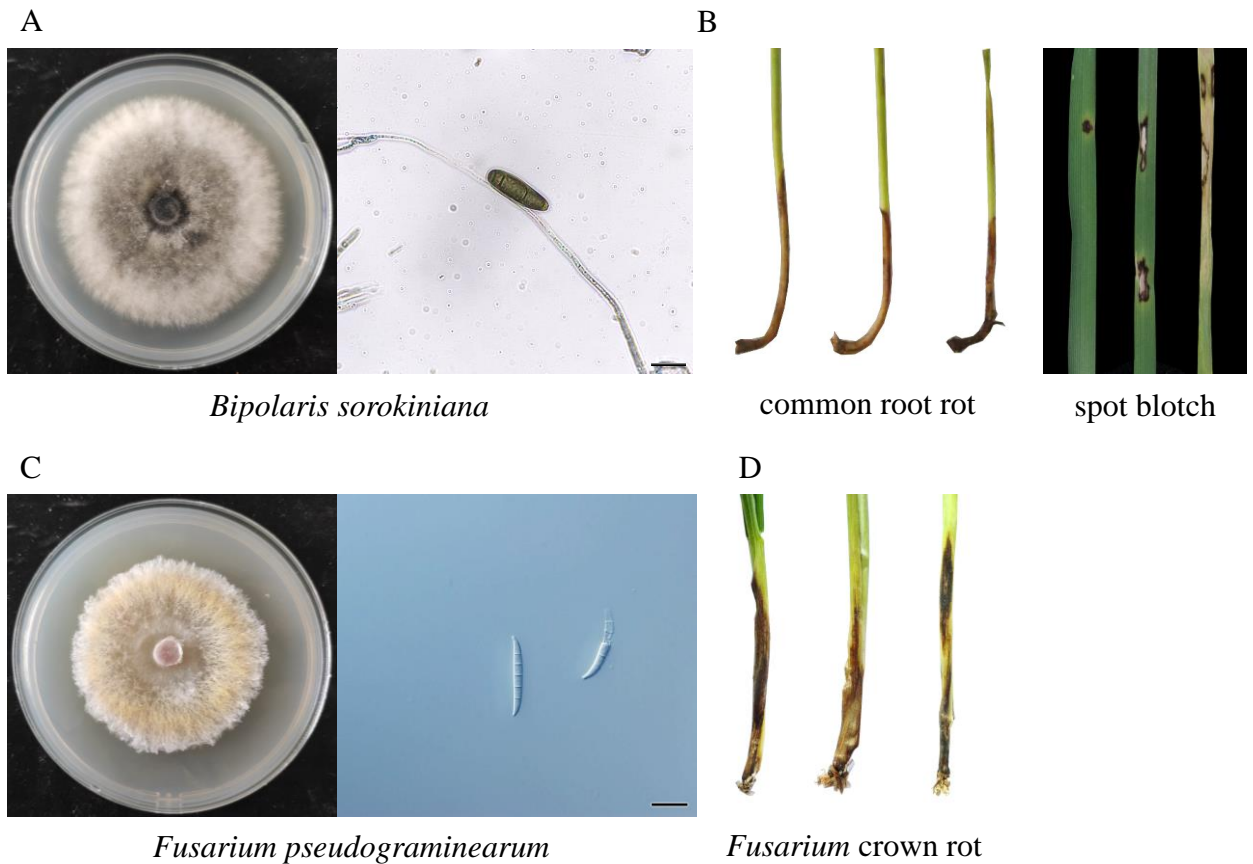

**Fig. 1 Pathogenic profiles of *Bipolaris sorokiniana* and *Fusarium pseudograminearum*.** (A) *B. sorokiniana* cultivated on PDA (potato dextrose agar) medium. Spores were directly collected from *B. sorokiniana* cultures on PDA medium. (B) Common root rot and spot blotch caused by *B. sorokiniana*. Infected wheat plants can be easily pulled out, the stem base and root system feel wet, and black and brown striped spots can be observed in both the stem base and lower leaves. (C) *F. pseudograminearum* cultivated on PDA medium. Spores of *F. pseudograminearum* can be induced on CMC (carboxymethyl cellulose sodium) medium. (D) *Fusarium* crown rot caused by *F. pseudograminearum*. The stem base of an infected wheat plant is dry and fragile, so can be easily broken apart. Additionally, dark and red brown rot can be observed in the stem base. Scale bar = 20  $\mu$ m.

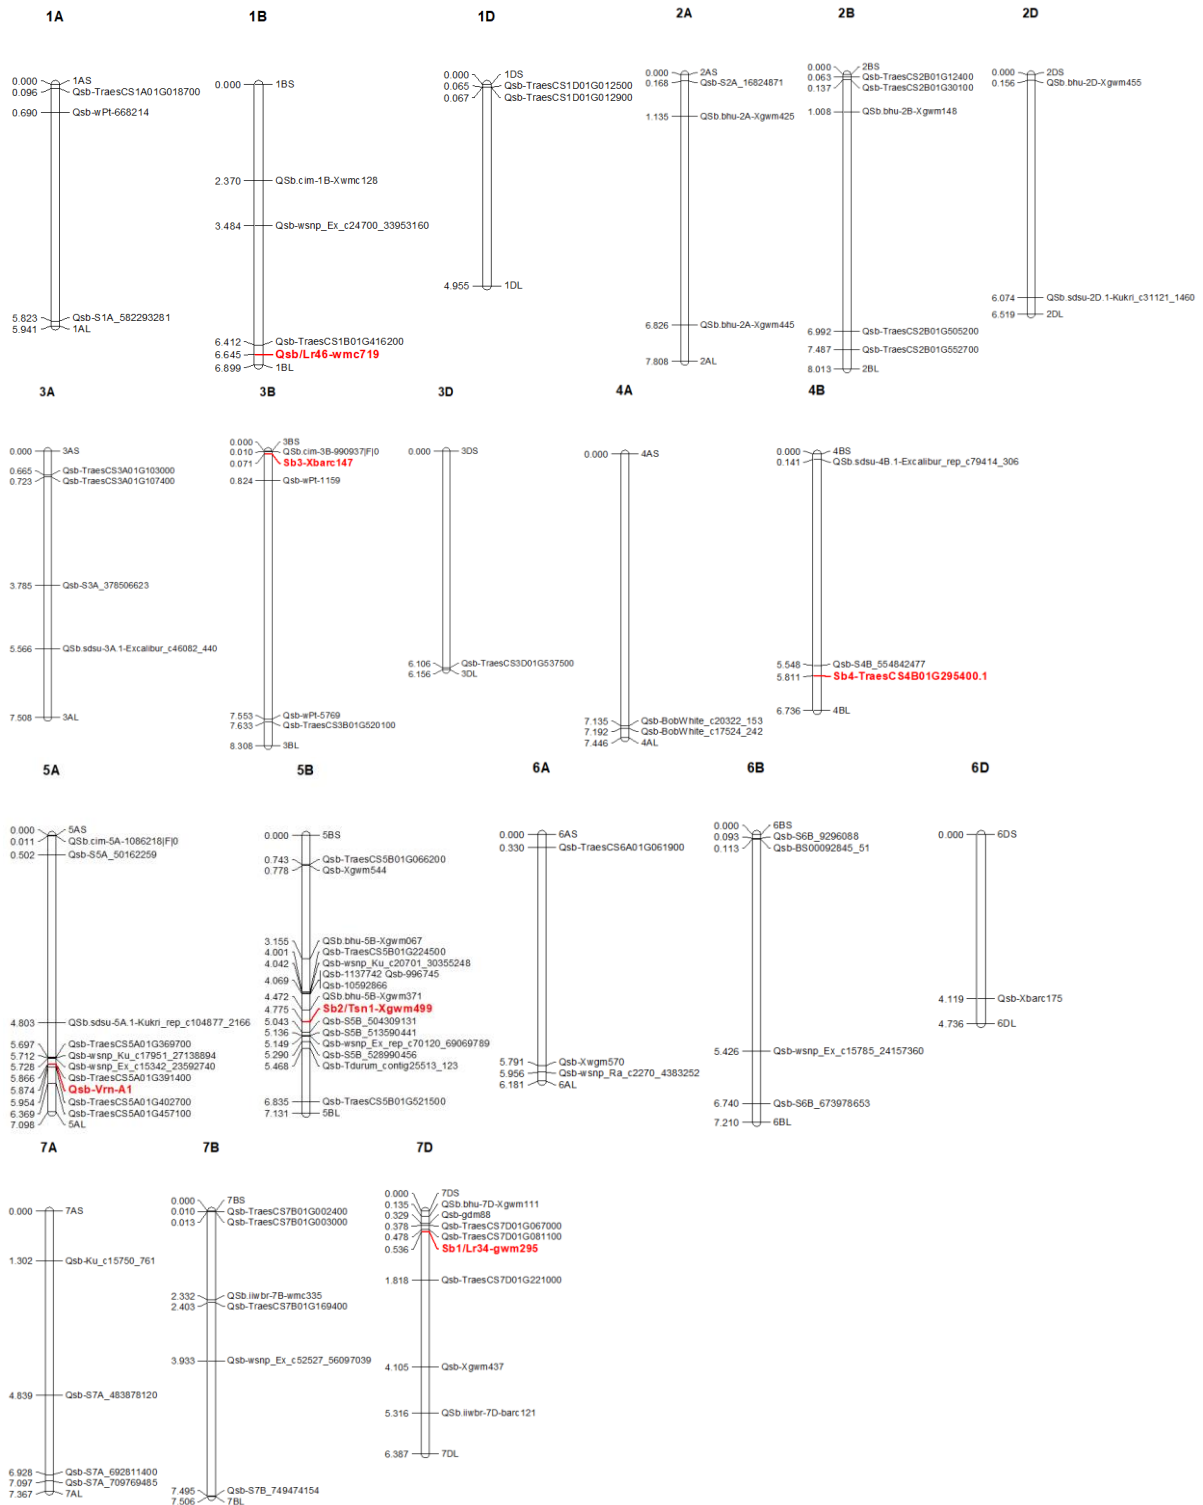

**Fig. 2 Genetic determinants of wheat resistance to common root rot (spot blotch).** Molecular markers, SNPs, and genes associated with common root rot or spot blotch resistant QTLs were collected from previous publications and searched against the JBrowse-1.12.3-release of common wheat “Chinese Spring” genome available from the “Triticeae Multi-omics Center (<http://202.194.139.32/>)”. Physical positions were used to generate a distribution map of all the collected QTLs using Mapchart v2.32 software. QTLs with major effect or linked with designated genes are highlighted in red. Detailed information for these QTLs can be found in **Table 1**.

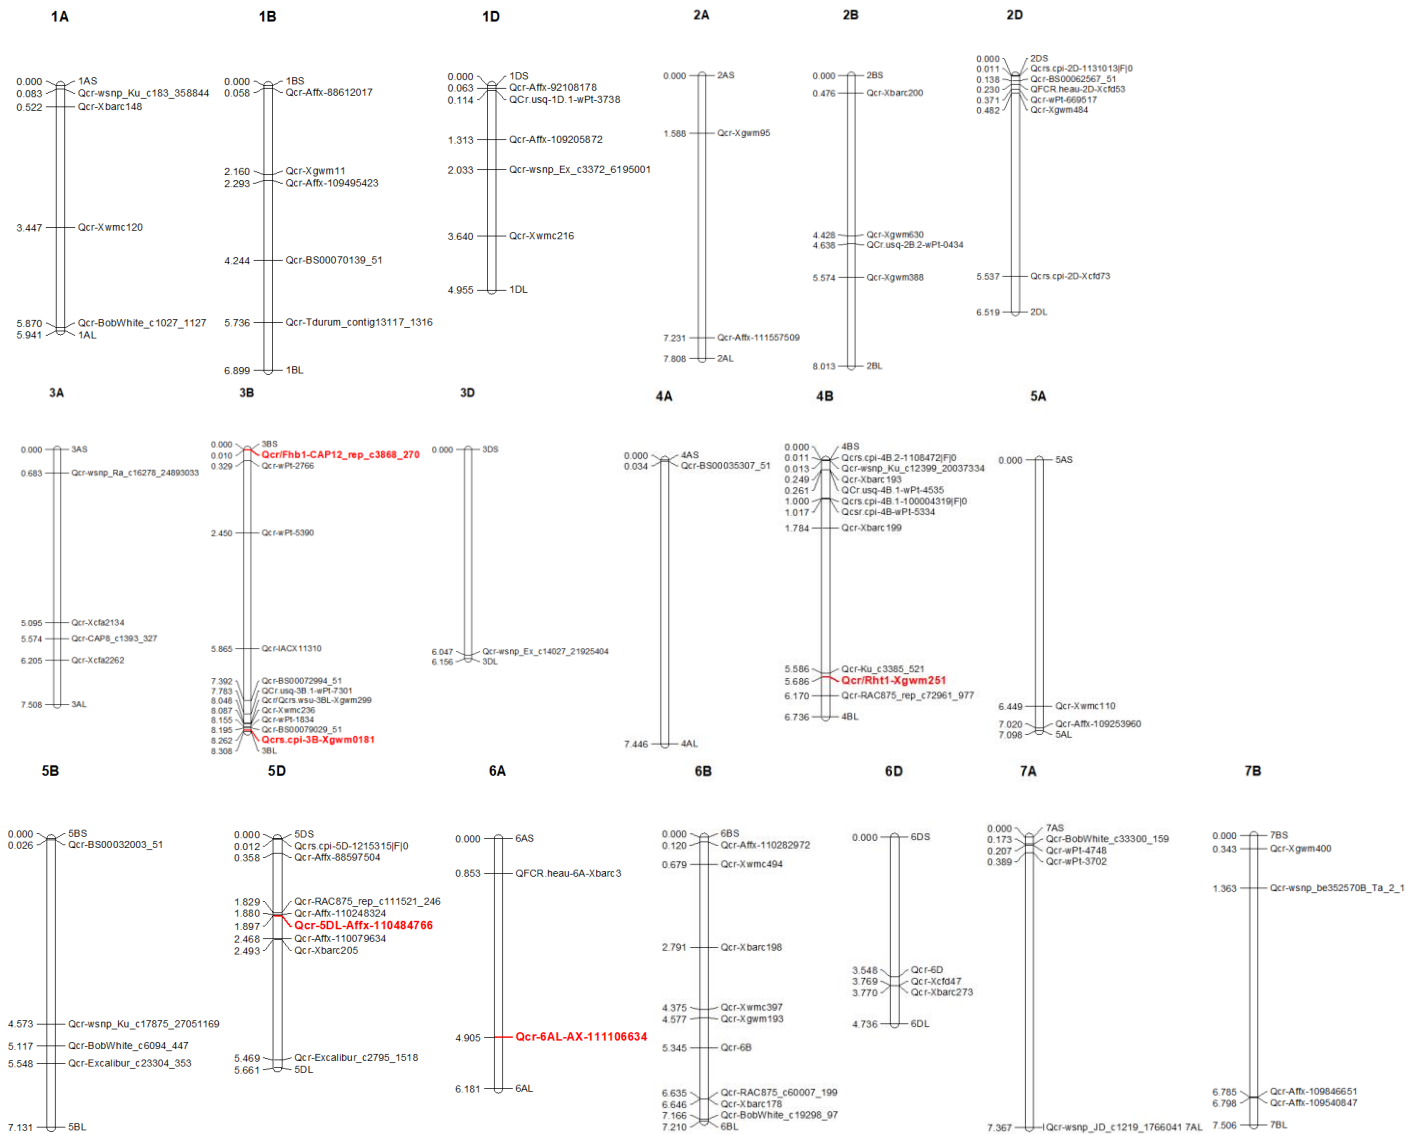

**Fig. 3 Genetic loci controlling wheat resistance to *Fusarium* roset rot.** Molecular markers, SNPs, and genes associated with FCR-resistant QTLs were collected from previous publications and searched against the JBrowse-1.12.3-release of common wheat “Chinese Spring” genome available from the “Triticeae Multi-omics Center (<http://202.194.139.32/>)”. Physical positions were used to generate a distribution map of all the collected QTLs using Mapchart v2.32 software. QTLs with major effect or linked with designated genes are highlighted in red. Detailed information for these QTLs can be found in **Table 2**.
